# Supplementary material for: Mycorrhizal Fungi of Phalaenopsis japonica (Orchidaceae) and Their Role in Seed Germination and Seedling Development
Source: MDPI journal article supplement (doi:10.3390/d16040218), 2024-04-03
Supplement: s1 [file s1]

Archive with 1 entries (1 files):
- diversity-2939443-supplementary.pdf
