# Supplementary material for: Mycorrhizal Fungi of Phalaenopsis japonica (Orchidaceae) and Their Role in Seed Germination and Seedling Development
Source: MDPI journal article supplement (doi:10.3390/d16040218), 2024-04-03
Supplement: s1 [file s1 › diversity-2939443-supplementary.pdf]

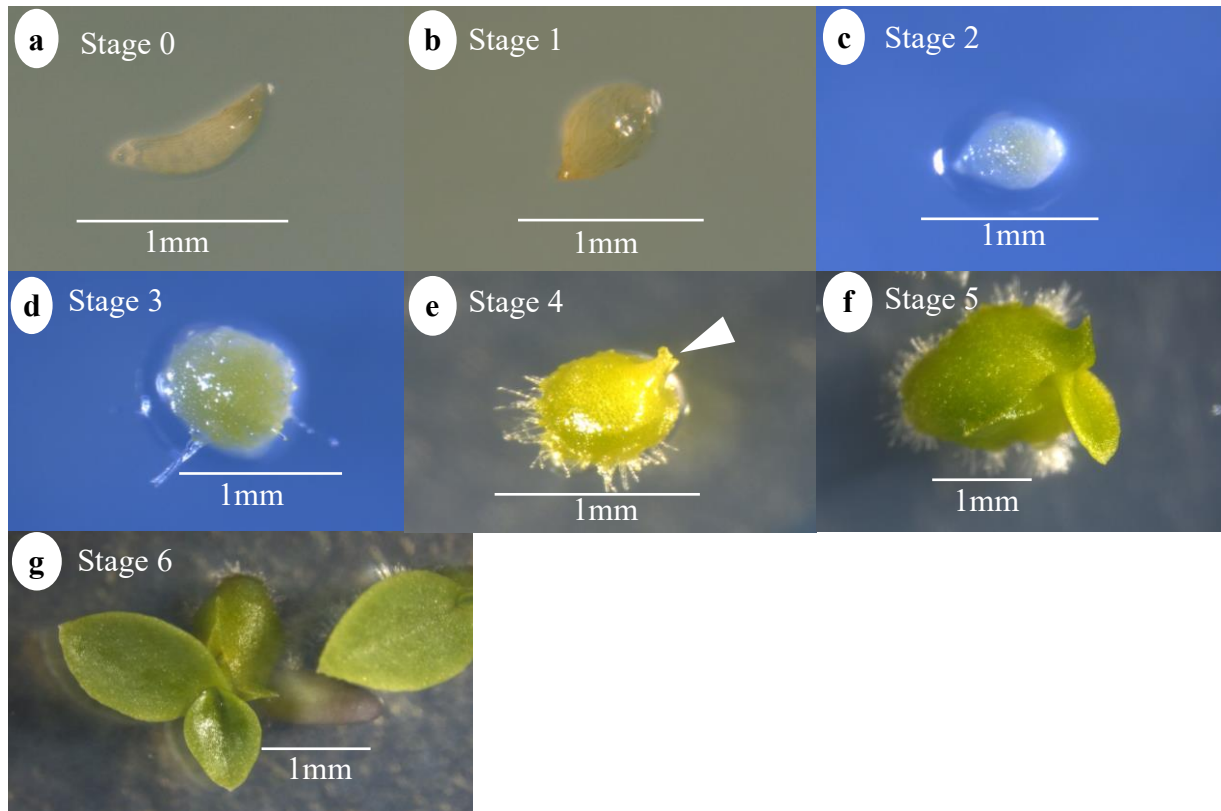

**Supplementary Figure S1.** The six developmental stages of seed germination and protocorm development in *P. japonica* seeds **(a)** Stage 0: no germination; **(b)** Stage 1: an enlarged embryo; **(c)** Stage 2: an enlarged embryo with ruptured seed coat; **(d)** Stage 3: a globular embryo (protocorm) with rhizoids; **(e)** Stage 4: a protocorm with an apical meristem (arrow); **(f)** Stage 5: emergence of the first leaf (seedling formation); and **(g)** Stage 6: a seedling with a first root and further development.

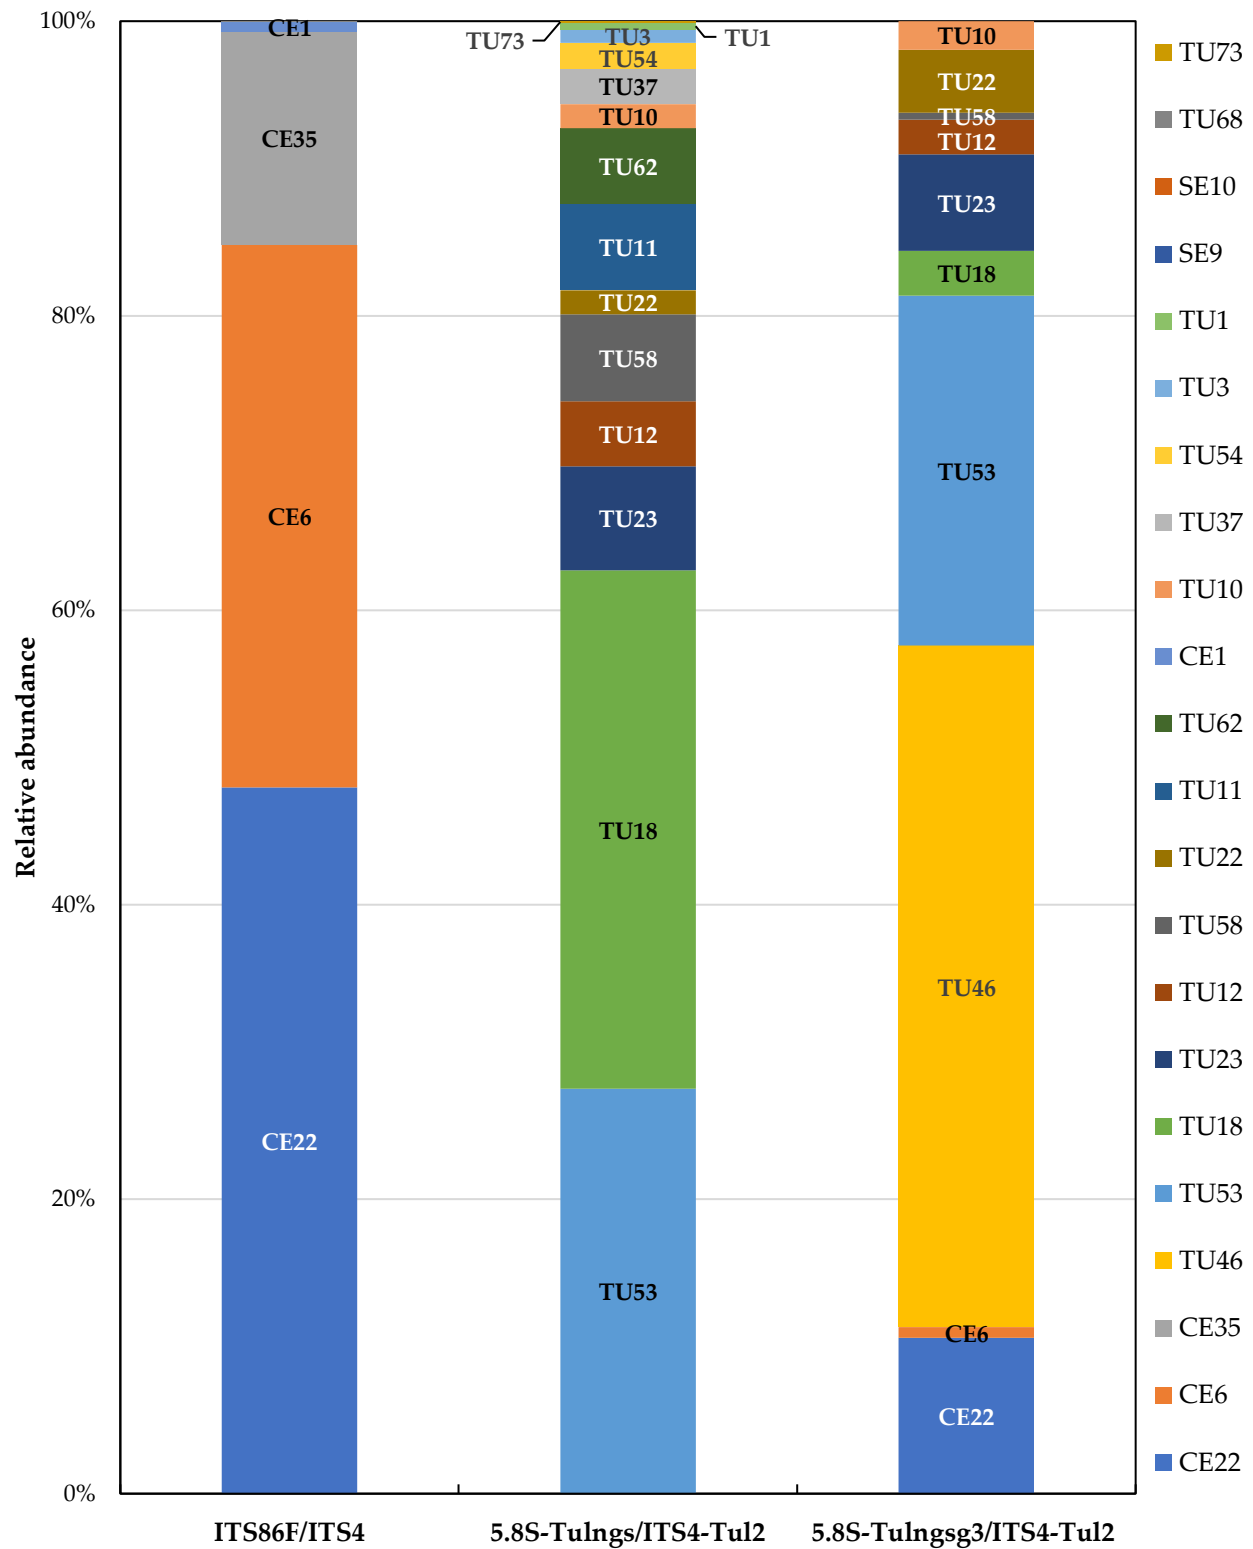

**Supplementary Figure S2.** Relative abundances of OMF OTUs obtained from *P. japonica* using fungal universal (ITS86F/ITS4) and Tulasnellaceae-specific (5.8S-Tulngs/ITS4-Tul2 and 5.8S-Tulngsg3/ITS4-Tul2) primer pairs. OTUs with fewer than 100 total reads were excluded. TU: Tulasnellaceae, CE: Ceratobasidiaceae, SE: Serendipitaceae. Sequences were assigned to OTUs at 97% sequence similarity. In total, 826,325 reads were obtained for OMF fungi.

**Supplementary Table S1.** Effects of fungal isolates on *P. japonica* seed germination and protocorm development after 4 months of culturing. Germination percentage (mean  $\pm$  SE, n=6) within columns marked by different letters are significantly different at  $p < 0.05$  (Tukey test).

| Treatment | Ratio of seed germination and protocorm development (%) |                    |                   |                     |                    |                   |                   |
|-----------|---------------------------------------------------------|--------------------|-------------------|---------------------|--------------------|-------------------|-------------------|
|           | Stage 0                                                 | Stage 1            | Stage 2           | Stage 3             | Stage 4            | Stage 5           | Stage 6           |
| CE6-1     | 0.60 $\pm$ 0.60a                                        | 0.00 $\pm$ 0.00a   | 10.52 $\pm$ 5.79a | 25.14 $\pm$ 6.47bc  | 21.48 $\pm$ 7.77c  | 13.60 $\pm$ 5.47b | 28.67 $\pm$ 7.43b |
| CE6-2     | 0.00 $\pm$ 0.00a                                        | 0.00 $\pm$ 0.00a   | 2.58 $\pm$ 1.42a  | 11.44 $\pm$ 2.84ab  | 14.45 $\pm$ 1.52bc | 17.75 $\pm$ 4.17b | 53.79 $\pm$ 7.04c |
| CE12      | 0.72 $\pm$ 0.72a                                        | 6.24 $\pm$ 1.03abc | 55.54 $\pm$ 6.96b | 29.91 $\pm$ 5.22c   | 6.88 $\pm$ 2.78ab  | 0.69 $\pm$ 0.69a  | 0.00 $\pm$ 0.00a  |
| CE22      | 0.00 $\pm$ 0.00a                                        | 4.93 $\pm$ 1.62ab  | 68.92 $\pm$ 1.71b | 19.57 $\pm$ 2.02bc  | 6.58 $\pm$ 1.19ab  | 0.00 $\pm$ 0.00a  | 0.00 $\pm$ 0.00a  |
| TU18      | 2.23 $\pm$ 1.42a                                        | 12.97 $\pm$ 3.46c  | 69.92 $\pm$ 4.63b | 14.88 $\pm$ 5.50abc | 0.00 $\pm$ 0.00a   | 0.00 $\pm$ 0.00a  | 0.00 $\pm$ 0.00a  |
| TU27      | 2.45 $\pm$ 1.20a                                        | 7.83 $\pm$ 0.87bc  | 89.72 $\pm$ 1.60c | 0.00 $\pm$ 0.00a    | 0.00 $\pm$ 0.00a   | 0.00 $\pm$ 0.00a  | 0.00 $\pm$ 0.00a  |
| Control   | 3.60 $\pm$ 1.30a                                        | 7.03 $\pm$ 1.87abc | 89.37 $\pm$ 1.68c | 0.00 $\pm$ 0.00a    | 0.00 $\pm$ 0.00a   | 0.00 $\pm$ 0.00a  | 0.00 $\pm$ 0.00a  |

Control: seeds without fungal inoculation
